# Supplementary material
Source: PubMed Central journal article supplement (PMC2781623)
Supplement: supp_M109.007997_Supplemental.pdf [file supp_M109.007997_Supplemental.pdf]

Fig. 1S

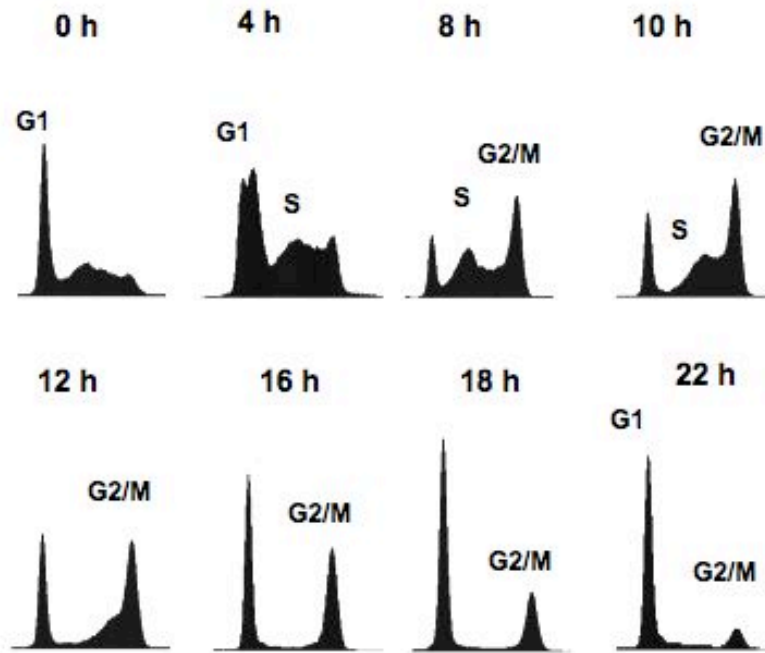

|             | 0h   | 4h   | 8h   | 10h  | 12h  | 16h  | 18h  | 22h  |
|-------------|------|------|------|------|------|------|------|------|
| <b>G2/M</b> | 4.1  | 7.8  | 25.3 | 36.1 | 36.0 | 42.1 | 23.4 | 12.2 |
| <b>S</b>    | 58.5 | 60.7 | 63.1 | 45.9 | 36.8 | 8.2  | 11.3 | 13.3 |
| <b>G1</b>   | 37.4 | 31.5 | 11.6 | 18.0 | 27.2 | 49.7 | 65.3 | 74.5 |

← G1/S      S      G2      M      M/G1      G1 →

A. T7-FoxM1 + Plk1

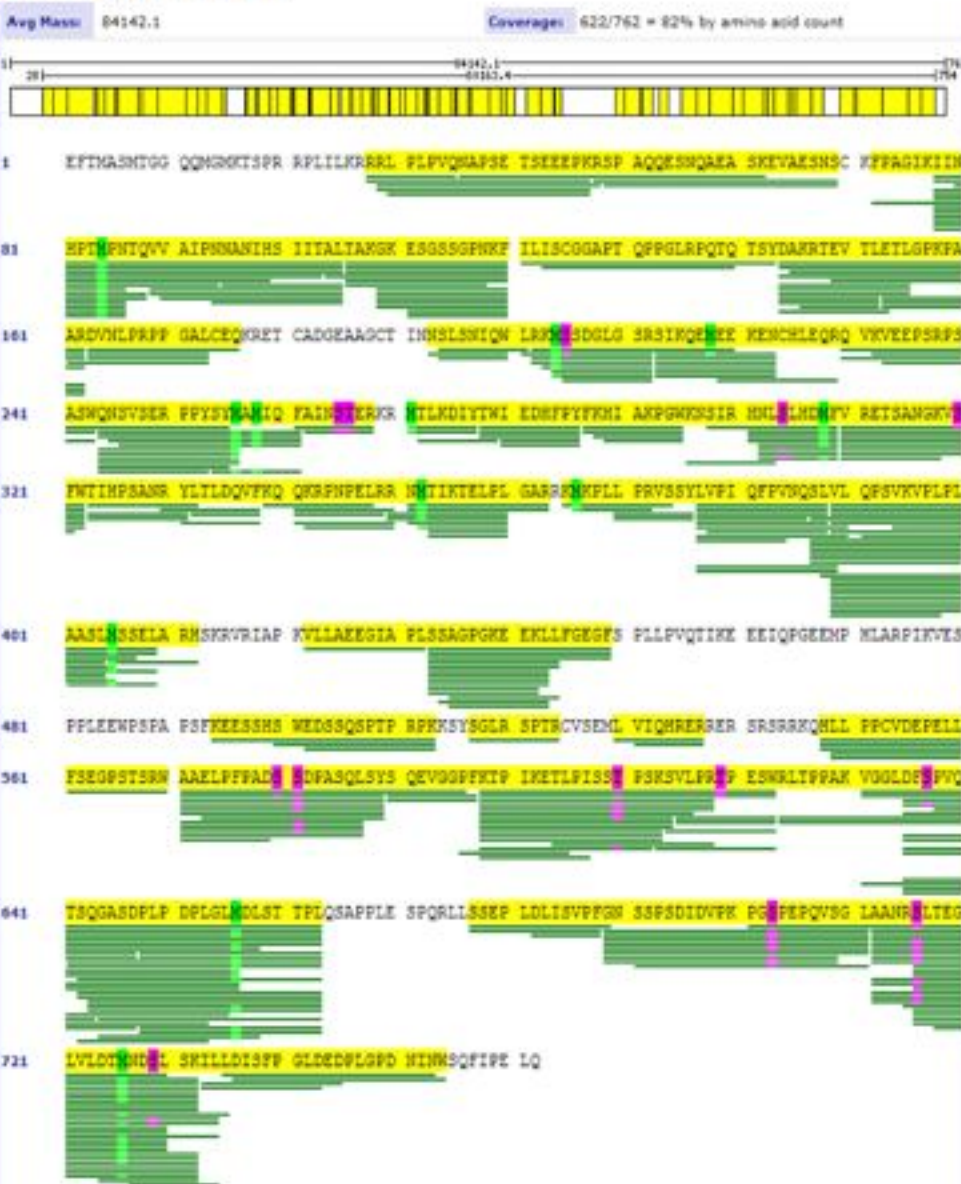

B. T7-FoxM1 + KD Plk1

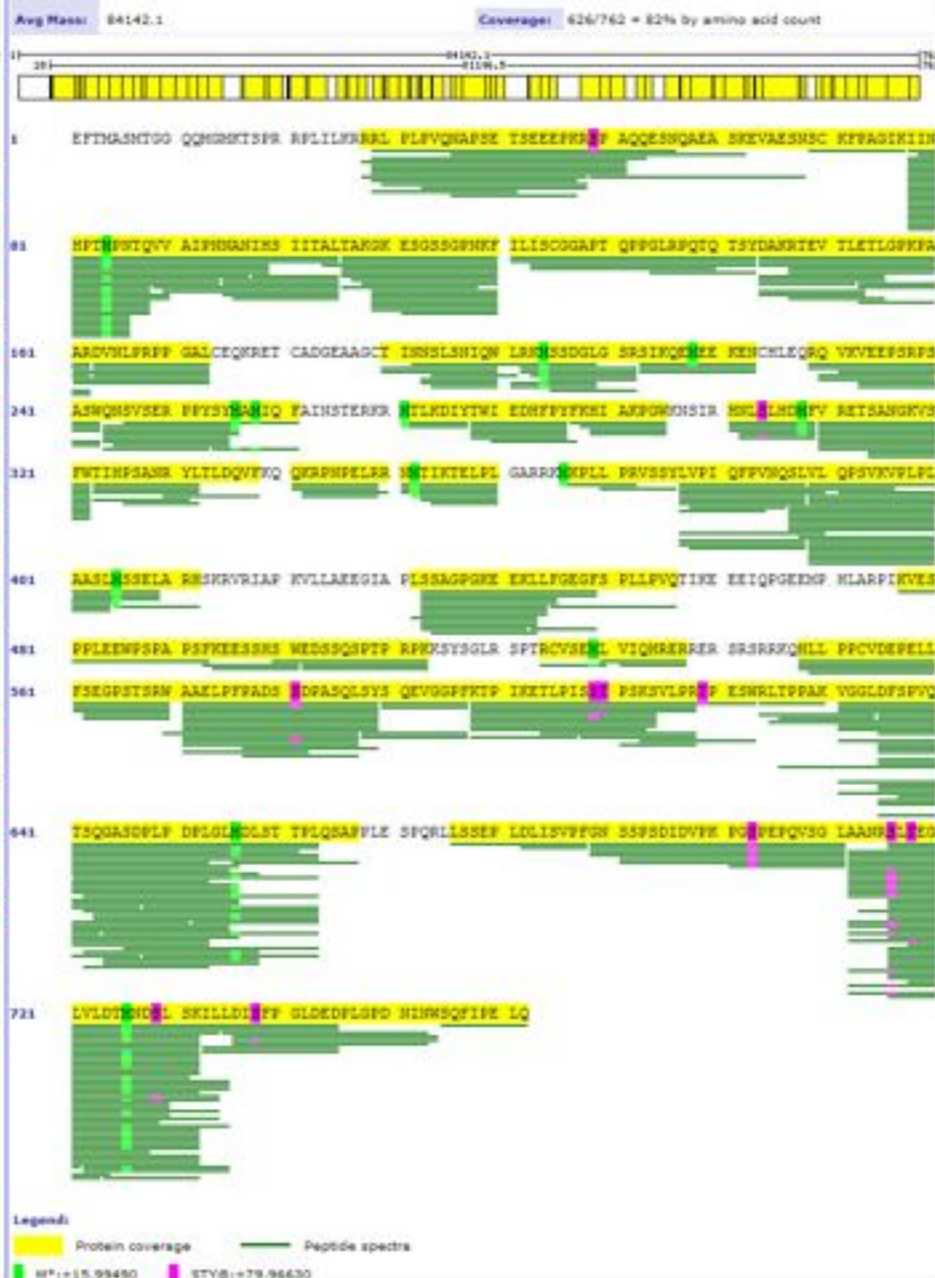

Fig. 3S

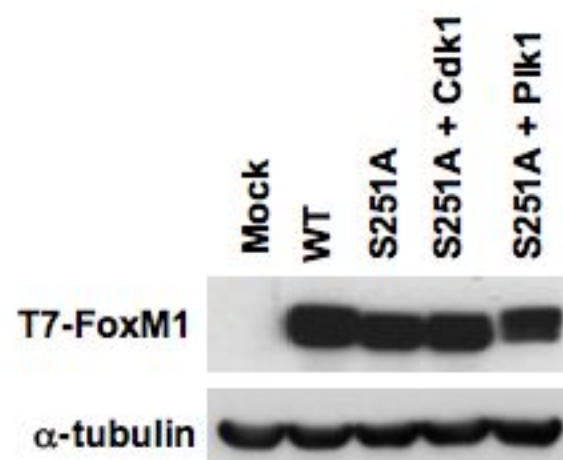

Fig.3S. U2OS cells were cotransfected with a vector expressing either T7FoxM1b WT or S251A proteins and a vector expressing Cdk1 or Plk1. The mobility of T7-FoxM1b protein was detected by western blot analysis using T7-tag mAb.
